# Supplementary material for: A new route through the layered hydroxide form for the synthesis of GdVO4 dispersible in polar solvents
Source: Royal Society of Chemistry journal article supplement (doi:10.1039/c4nj01560f), 2014-01-01
Supplement: c4nj01560f1.pdf [file c4nj01560f1.pdf]

## Electronic Supplementary Information

### **A new route through the layered hydroxide form for the synthesis of GdVO<sub>4</sub> dispersible in polar solvents**

Heejin Jeong,<sup>‡</sup> Byung-Il Lee<sup>‡</sup> and Song-Ho Byeon\*

*Department of Applied Chemistry, College of Applied Science, Kyung Hee University,  
Gyeonggi, 446-701, Korea*

*E-mail: shbyun@khu.ac.kr*

*New J. Chem.*

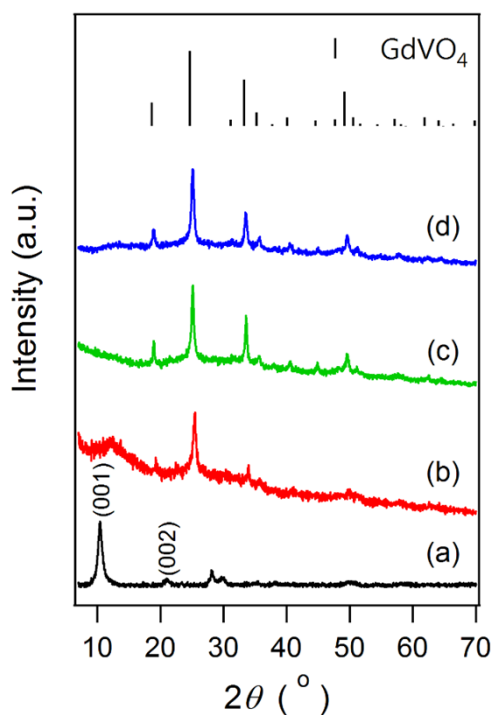

**Fig. S1** Powder XRD patterns of (a) LGdH:Eu and its products obtained after reaction in (b) 10, (c) 25, and (d) 50 mM NaVO<sub>3</sub> solutions for 12 h at room temperature. Relative diffraction intensities of GdVO<sub>4</sub> according to its JCPDS card (No. 86-0996) are given for comparison.

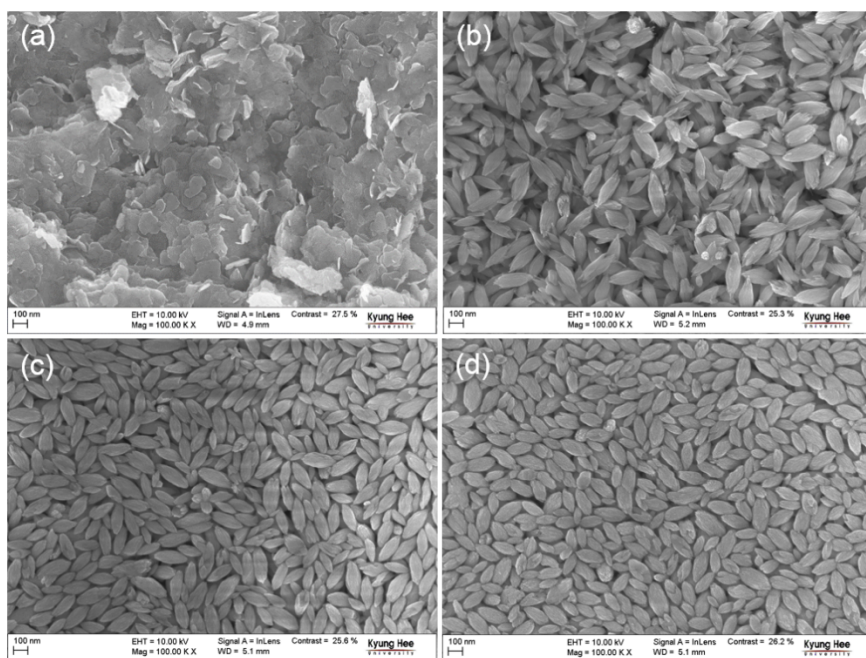

**Fig. S2** FE-SEM images of (a) LGdH and its products obtained after reaction in (b) 10, (c) 25, and (d) 50 mM NaVO<sub>3</sub> solutions for 12 h at room temperature.

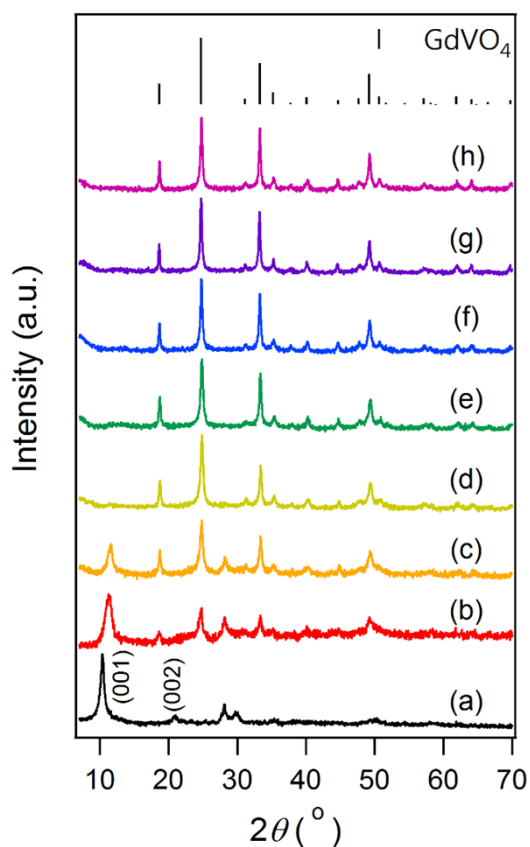

**Fig. S3** Powder XRD patterns of LGdH:Eu (a) before and after reaction in 50 mM  $NaVO_3$  solution for (b) 5 min, (c) 30 min, (d) 1 h, (e) 2 h, (f) 3 h, (g) 6 h, and (h) 12 h at room temperature. Relative diffraction intensities of  $GdVO_4$  according to its JCPDS card (No. 86-0996) are given for comparison.

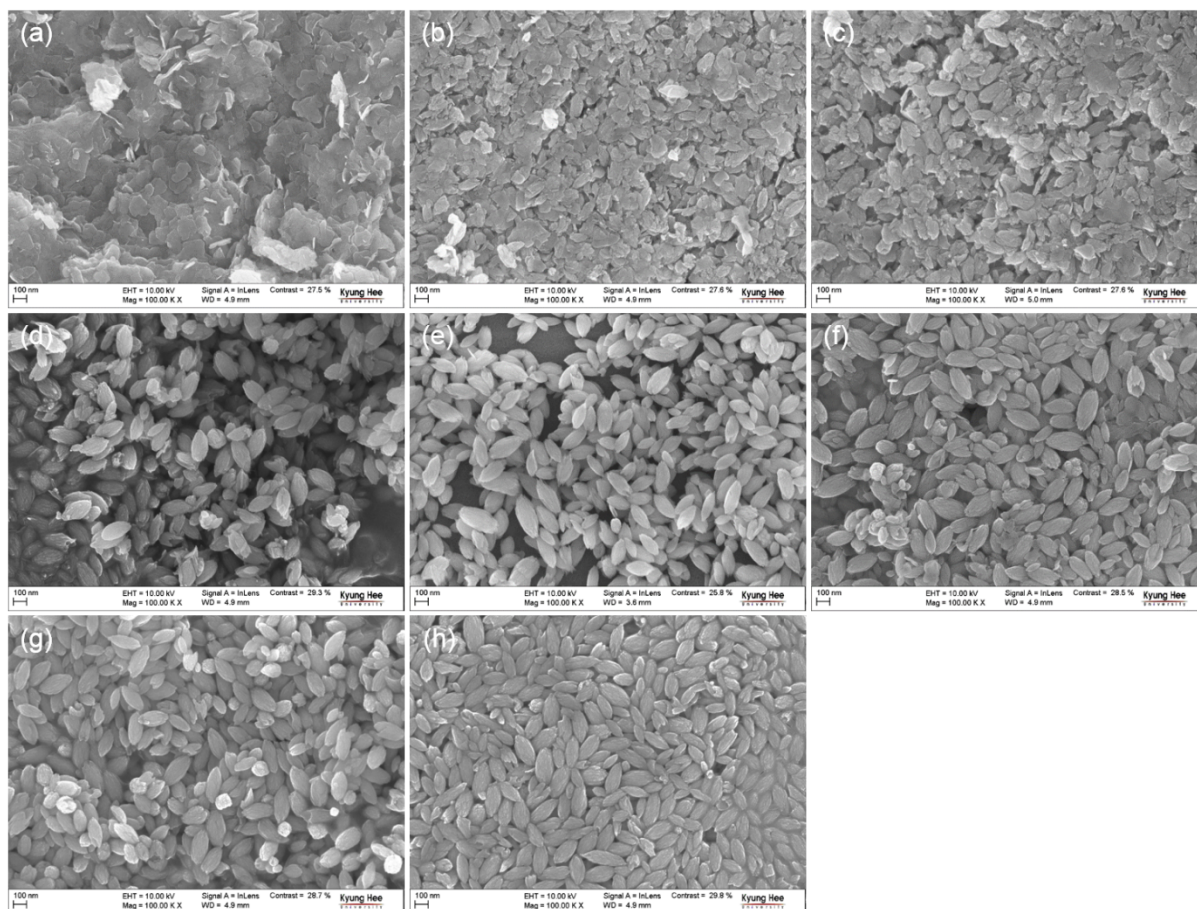

**Fig. S4** FE-SEM images of LGdH:Eu (a) before and after reaction in 50 mM aqueous  $\text{NaVO}_3$  solution for (b) 5 min, (c) 30 min, (d) 1 h, (e) 2 h, (f) 3 h, (g) 6 h, and (h) 12 h at room temperature.

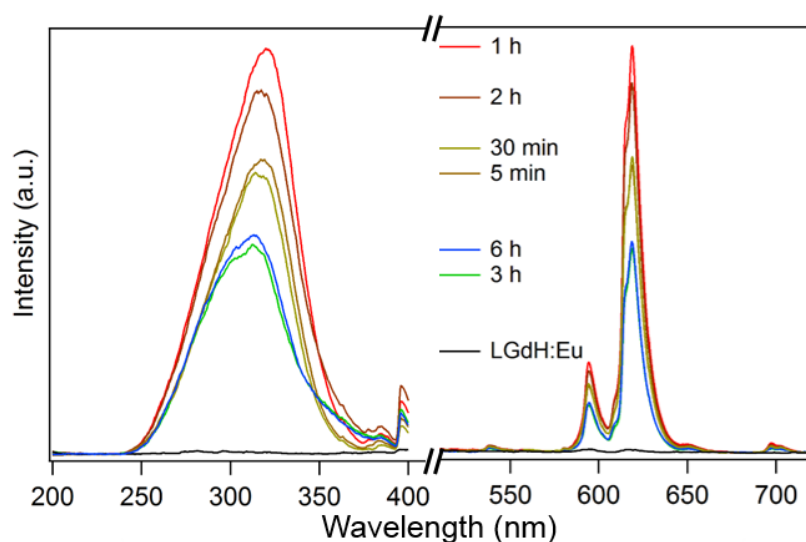

**Fig. S5** Excitation ( $\lambda_{\text{em}} = 618 \text{ nm}$ ) and emission ( $\lambda_{\text{ex}} = 314 \text{ nm}$ ) spectra of LGdH:Eu before (black curve) and after reaction in 50 mM  $\text{NaVO}_3$  solution for 5 min – 6 h at room temperature.

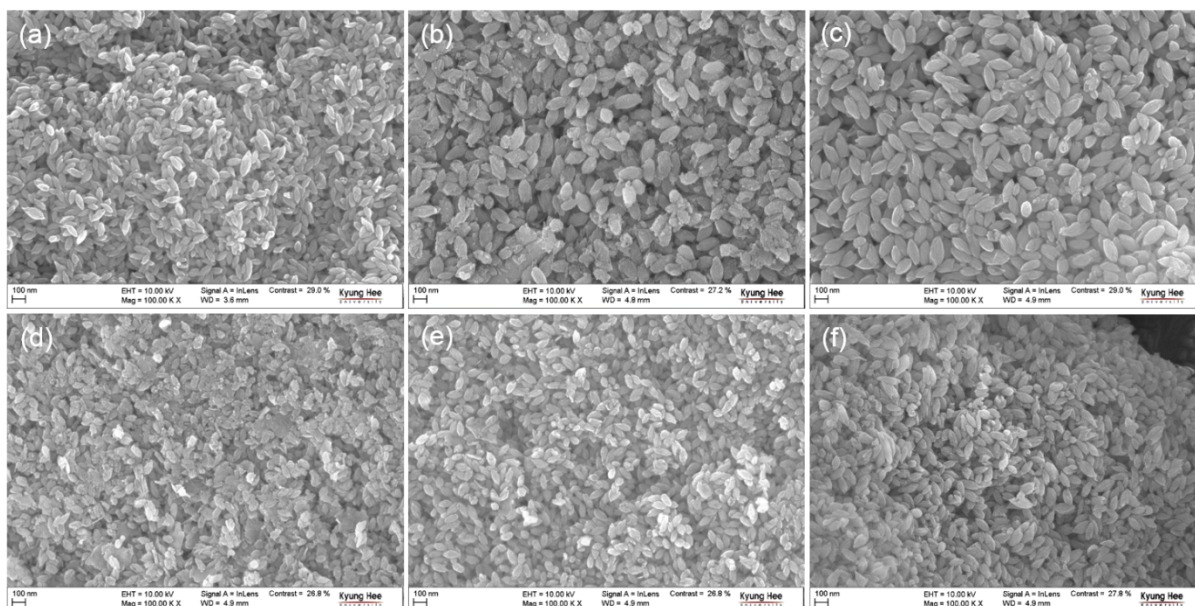

**Fig. S6** FE-SEM images of  $\text{GdVO}_4:\text{Eu}$  obtained after reacting LGdH:Eu in 50 mM aqueous  $\text{NaVO}_3$  solution at pH = 8 for (a) 1 h, (b) 2 h, and (c) 3 h and at pH = 9 for (d) 1 h, (e) 2 h, and (f) 3 h at room temperature.

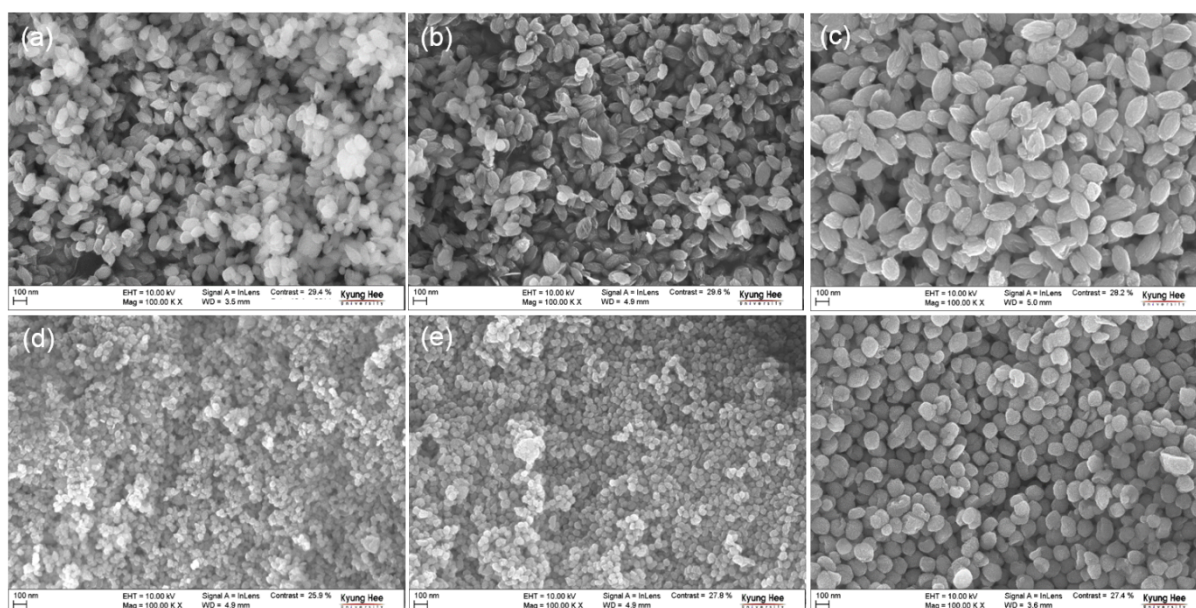

**Fig. S7** FE-SEM images of  $\text{GdVO}_4:\text{Eu}$  obtained after reacting LGdH:Eu in 50 mM  $\text{NaVO}_3$  / 100 mM  $\text{NaCl}$  solution for (a) 1 h, (b) 2 h, and (c) 3 h and in 50 mM  $\text{NaVO}_3$  / 1.0 M  $\text{NaCl}$  solution for (d) 1 h, (e) 2 h, and (f) 3 h at room temperature.

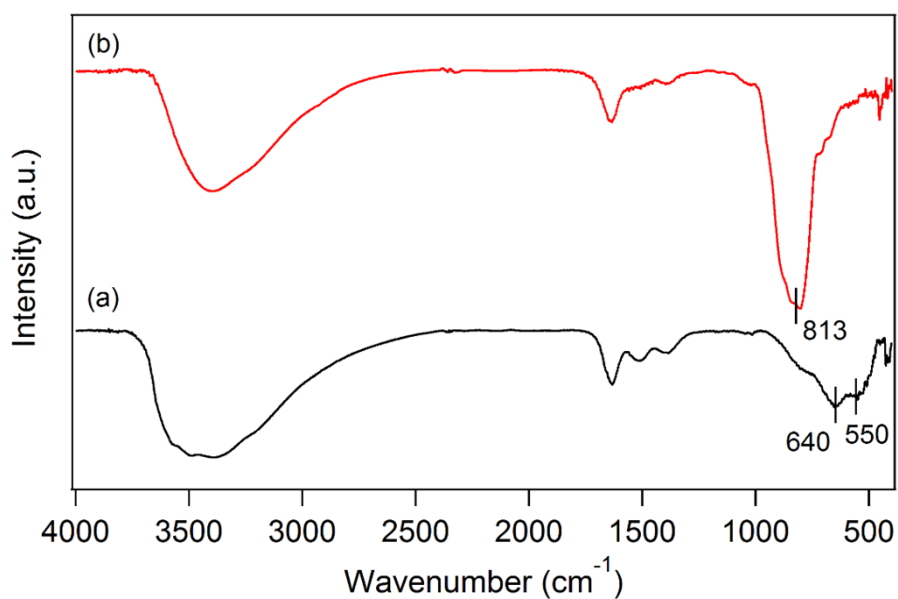

**Fig. S8** FT-IR spectra of (a) LGdH:Eu and (b) GdVO<sub>4</sub>:Eu obtained after its reaction in 50 mM VO<sub>3</sub><sup>-</sup> solution for 2 h.

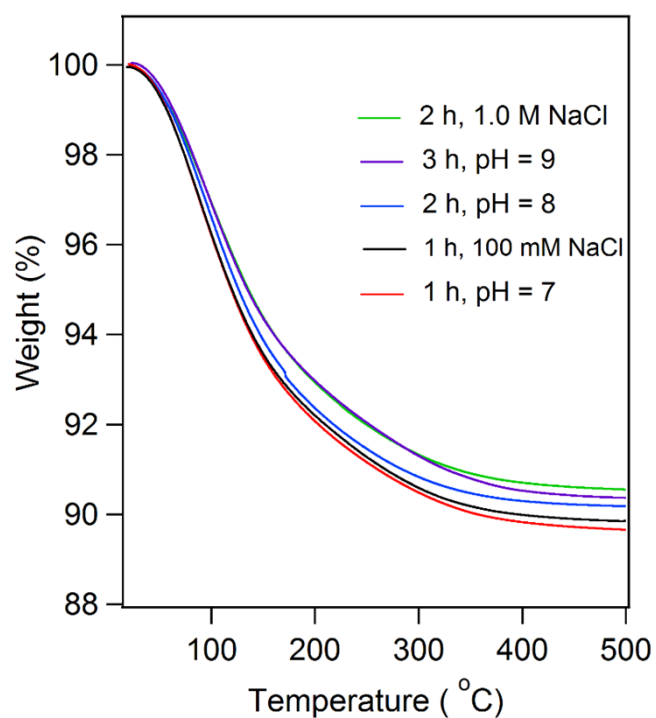

**Fig. S9** TG curves of GdVO<sub>4</sub>:Eu obtained after reacting LGdH:Eu in 50 mM VO<sub>3</sub><sup>-</sup> solution at various conditions for different reaction times.

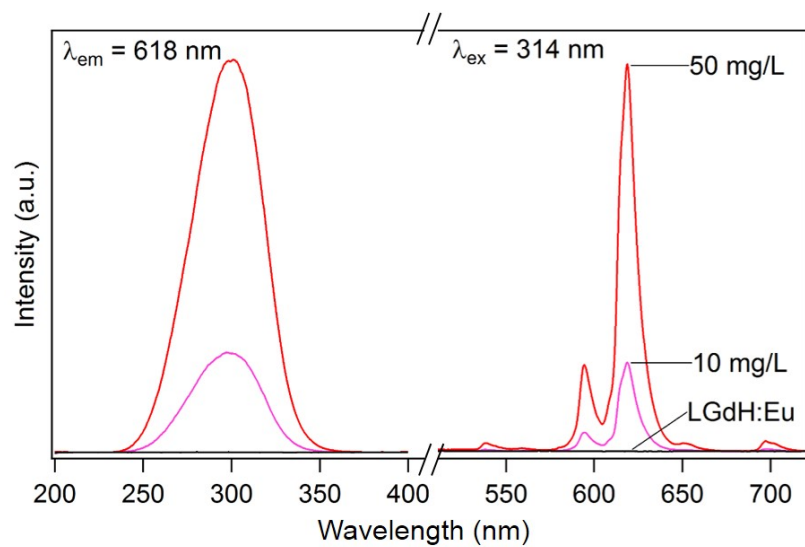

**Fig. S10** Excitation and emission spectra of aqueous colloidal suspensions containing LGdH:Eu (50 mg/L) and GdVO<sub>4</sub>:Eu (50 mg/L and 10 mg/L).
